# Supplementary material
Source: PubMed Central journal article supplement (PMC6203303)
Supplement: NIHMS990051-supplement-1.pdf [file NIHMS990051-supplement-1.pdf]

**Fig S1****A**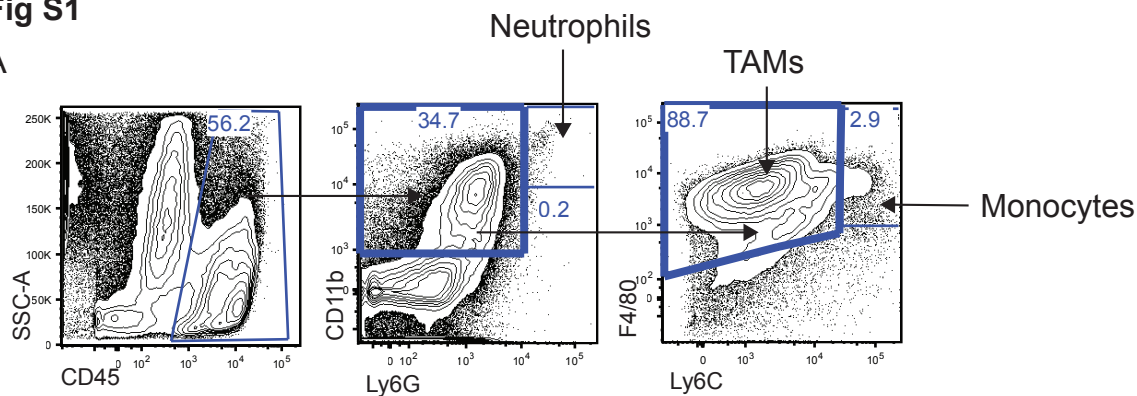**B**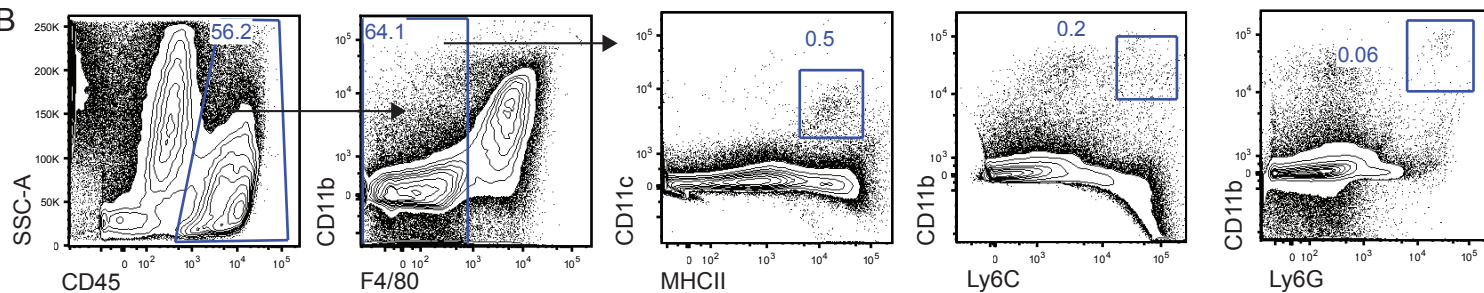**C**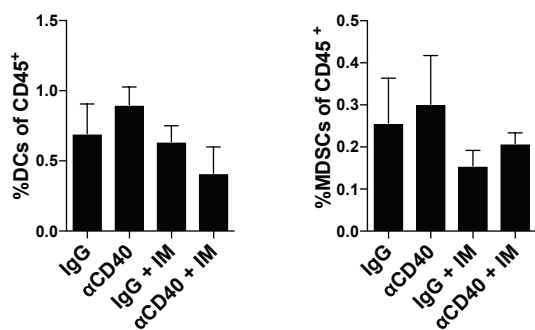

**(A)** Representative flow plots of TAM gating (CD45<sup>+</sup>Ly6G<sup>+</sup>F4/80<sup>+</sup>CD11b<sup>+</sup>Ly6C<sup>lo</sup>) with exclusion of Ly6G<sup>+</sup>CD11b<sup>+</sup> (neutrophils) and Ly6C<sup>hi</sup>CD11b<sup>+</sup> cells, and monocyte gating (CD45<sup>+</sup>Ly6G<sup>+</sup>F4/80<sup>+</sup>CD11b<sup>+</sup>Ly6C<sup>hi</sup>) in tumors from untreated *Kit*<sup>V558Δ/+</sup> mice. **(B)** Representative flow plots of dendritic cell (DC, CD45<sup>+</sup>F4/80<sup>+</sup>CD11c<sup>+</sup>MHCII<sup>+</sup>) and MDSC (CD45<sup>+</sup>F4/80<sup>+</sup>CD11b<sup>+</sup>Ly6C<sup>+</sup> or Ly6G<sup>+</sup>) gating in tumors from untreated *Kit*<sup>V558Δ/+</sup> mice. **(C)** DCs and MDSCs as percentage of CD45<sup>+</sup> in *Kit*<sup>V558Δ/+</sup> tumors after two weeks of treatment. Data represent mean ± SEM.

**Fig S2**

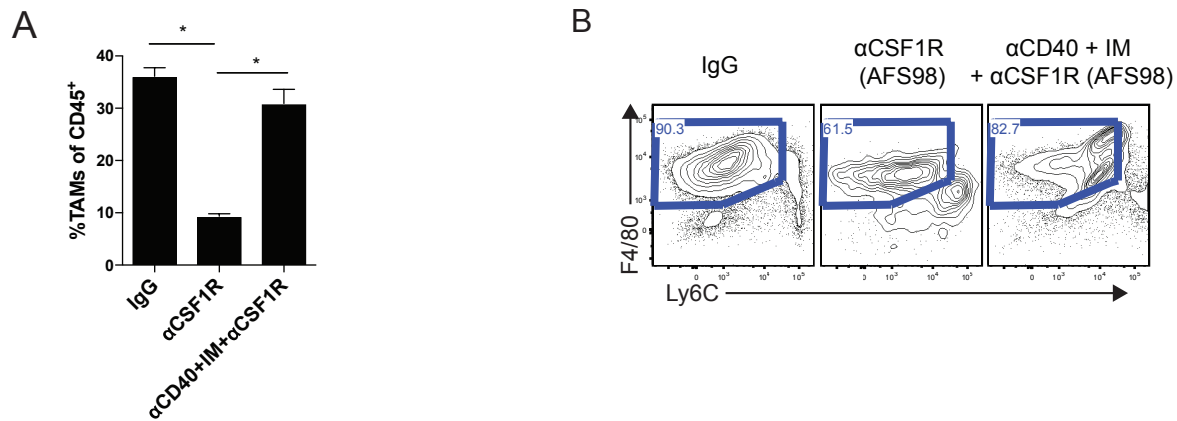

**(A)** TAMs as percentage of CD45<sup>+</sup> cells in *Kit*<sup>V558Δ/+</sup> tumors after two weeks of treatment. An antibody was used to inhibit CSF1R (AFS98). **(B)** Representative TAM flow plots. Data represent mean ± SEM.

**Fig S3**

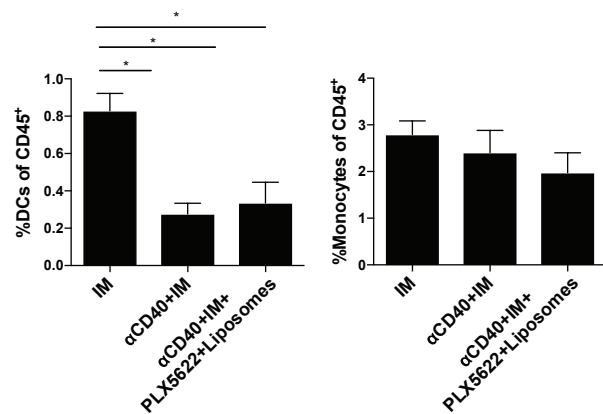

DCs and monocytes as percentage of CD45<sup>+</sup> cells in *Kit*<sup>V558Δ/+</sup> tumors after two weeks of treatment as assessed by flow cytometry. Data represent mean ± SEM, \**P* < 0.05.

**Fig S4**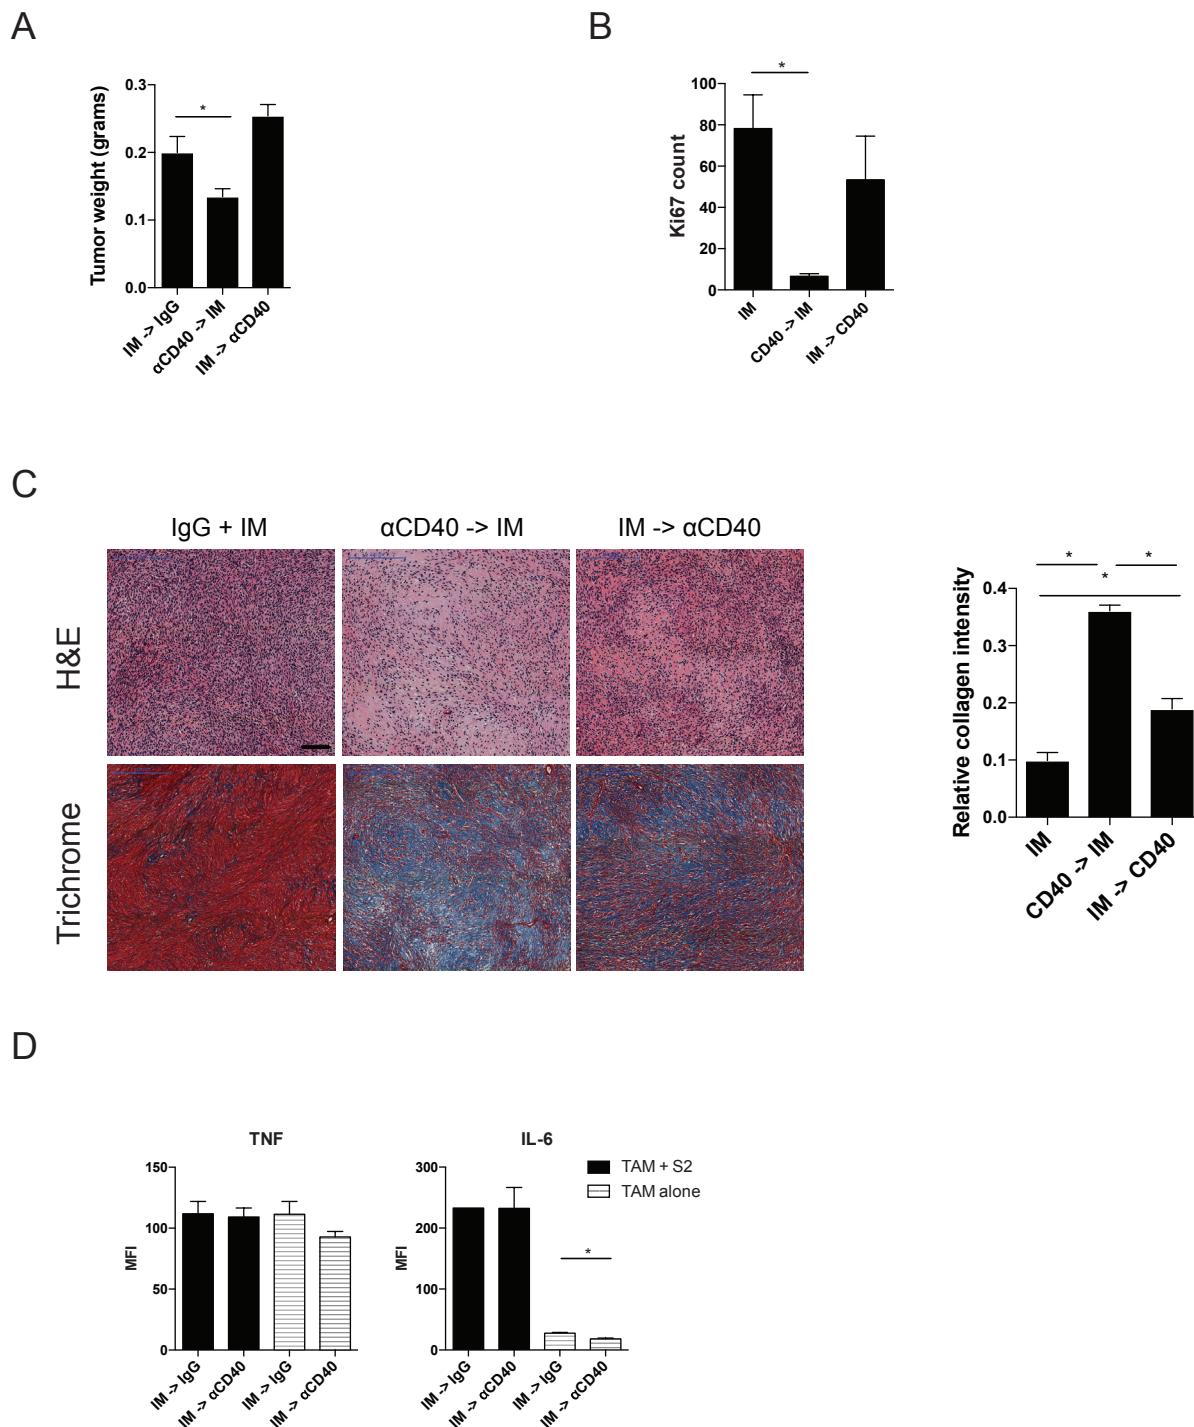

*Kit<sup>V558Δ/+</sup>* mice were treated with either a single injection of αCD40 3d before or after initiation of imatinib. Tumors were analyzed at 2 weeks (4-7 mice/group). **(A)** Tumor weight. **(B)** Ki67 count representing the number of positively stained nuclei in one 800x 730 μm field per tumor. **(C)** Representative H&E and Trichrome, and quantification of collagen staining on Trichrome. Bar represents 100 μm. **(D)** TAMs from *Kit<sup>V558Δ/+</sup>* mice treated *in vivo* for 4d with continuous imatinib on day 0 followed by a single injection of αCD40 on day 3 or the corresponding controls (pooled from 3-4 mice) were plated in 96-well round-bottom plates either alone or co-cultured with the S2 tumor cell line for 3d. Supernatants were harvested to measure TNF and IL-6 production with a cytometric bead array. Data represent mean ± SEM, \**P* < 0.05.

**Fig S5**

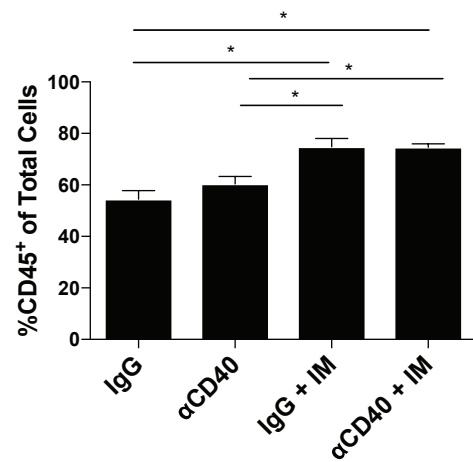

*Kit*<sup>V558Δ/+</sup> mice were treated for 2 weeks and intratumoral CD45<sup>+</sup> cells as percentage of total cells were assessed by flow cytometry. Data represent mean ± SEM, \**P* < 0.05.
