# Supplementary material
Source: PubMed Central journal article supplement (PMC6203303)
Supplement: NIHMS990051-supplement-Supplementary_Table_1.pdf [file NIHMS990051-supplement-Supplementary_Table_1.pdf]

**Supplementary Table S1**

| <b>Characteristics</b>                                  | <b>Untreated</b> | <b>Sensitive</b> | <b>Resistant</b> |
|---------------------------------------------------------|------------------|------------------|------------------|
| <b>Number of patients</b>                               | 24               | 8                | 11               |
| <b>Number of specimens</b>                              | 26               | 9                | 15               |
| <b>Median age (range)</b>                               | 64.5 (18-86)     | 58 (34-66)       | 59 (45-80)       |
| <b>Male</b>                                             | 10               | 5                | 9                |
| <b>Location</b>                                         |                  |                  |                  |
| Gastric                                                 | 19               | 2                | 2                |
| Small Bowel                                             | 4                | 4                | 2                |
| Liver                                                   | 3                | 0                | 2                |
| Peritoneum                                              | 0                | 2                | 6                |
| Other*                                                  | 0                | 1                | 3                |
| <b>Tyrosine kinase inhibitor (most recent)</b>          |                  |                  |                  |
| Imatinib                                                | Not applicable   | 8                | 6                |
| Sunitinib                                               | Not applicable   | 0                | 2                |
| Multiple                                                | Not applicable   | 0                | 1                |
| Other                                                   | Not applicable   | 0                | 2                |
| <b>Median cumulative duration of treatment (months)</b> | Not applicable   | 6.5 (4-11.6)     | 45 (1.1-143.4)   |
| <b>Mutation of tumor specimen</b>                       |                  |                  |                  |
| <i>KIT</i> exon 9                                       | 0                | 1                | 0                |
| <i>KIT</i> exon 11                                      | 12               | 5                | 9                |
| <i>KIT</i> exon 17                                      | 0                | 0                | 3                |
| PDGFRA                                                  | 0                | 0                | 2                |
| WT                                                      | 5                | 0                | 1                |
| Unavailable                                             | 9                | 3                | 0                |

\*Other locations were rectal (sensitive) and abdominal wall, diaphragm, and pleura (resistant).
